# Supplementary material for: Pulmonary Arterial Hypertension and Chronic Thromboembolic Pulmonary Hypertension: An Immunological Perspective
Source: PubMed Central journal article supplement (PMC7074374; doi:10.3390/jcm9020561), 2020-02-19
Supplement: jcm-09-00561-s001.pdf [file jcm-09-00561-s001.pdf]

**Table 1.** Pre-clinical therapeutic targets in experimental PH.

| Target            | Therapy    | MCT-PH<br>Rats | Sugen/hypoxia<br>PH rats | Chronic/hypoxia<br>PH mice | Sugen/hypoxia<br>PH mice | Endotoxemic<br>PH pigs | Ref         |
|-------------------|------------|----------------|--------------------------|----------------------------|--------------------------|------------------------|-------------|
| IL-1              | Antagonist | X              |                          |                            |                          |                        | 114         |
| IL-6              | Antagonist | X              | X                        | X                          |                          |                        | 78,115      |
| TGF- $\beta$      | Antagonist | X              | X                        | X                          |                          |                        | 132         |
| BMPR2             | Agonist    | X              | X                        | X                          |                          |                        | 127,128,131 |
| TNF- $\alpha$     | Antagonist | X              | X                        |                            |                          | X                      | 118-121     |
| NF- $\kappa\beta$ | Antagonist | X              | X                        | X                          | X                        |                        | 136-139,147 |
| LTA4/B4           | Antagonist | X              | X                        |                            |                          |                        | 37,150      |
